# Supplementary material for: The bond cover approach to chemical topology.
Source: Royal Society of Chemistry journal article supplement (doi:10.1039/b107339g), 2001-11-15
Supplement: b107339g.doc [file b107339g.doc]

# **Supplementary Information**

# All possible covers for cyclopropane (*X*  *K*3) and 2-methylpropane (*X*  *K*1,3) are listed below. The ID codes with the same number indicate non-isomorphic covers of the same kind, which are drawn below (Fig. S1). The rest can be constructed uniquely (up to isomorphism) from the information given. The covers for 2-methylpropane can be drawn by analogy. (N.B., isomorphic graphs have the same adjacency relationships, i.e., they are the same mathematical object presented in different ways.)

ID cover number

(1) *X* 1

(2) *X* + *K*1,1 3

(3) *X* + 2*K*1,1 3

(4) *X* + 3 *K*1,1 1

(5) *X* + *K*1,2 3

(6a) *X* + *K*1,2 + *K*1,1 6

(6b) *X* + *K*1,2 + *K*1,1 3

(7a) *X* + *K*1,2 + 2*K*1,1 3

(7b) *X* + *K*1,2 + 2*K*1,1 6

(8) *X* + *K*1,2 + 3*K*1,1 3

(9) *X* + 2*K*1,2 3

(10a) *X* + 2*K*1,2 + *K*1,1 3

(10b) *X* + 2*K*1,2 + *K*1,1 6

(11a) *X* + 2*K*1,2 + 2*K*1,1 6

(11b) *X* + 2*K*1,2 + 2*K*1,1 3

(12) *X* + 2*K*1,2 + 3*K*1,1 3

(13) *X* + 3*K*1,2 1

ID cover number (14) *X* + 3*K*1,2 + *K*1,1 3

(15) *X* + 3*K*1,2 + 2*K*1,1 3

(16) *X* + 3*K*1,2 + 3*K*1,1 1

(17) *K*1,2 + *K*1,1 3

(18) *K*1,2 + 2*K*1,1 6

(19) *K*1,2 + 3*K*1,1 3

(20) 2*K*1,2 3

(21a) 2*K*1,2 + *K*1,1 3

(21b) 2*K*1,2 + *K*1,1 6

(22a) 2*K*1,2 + 2*K*1,1 6

(22b) 2*K*1,2 + 2*K*1,1 3

(23) 2*K*1,2 + 3*K*1,1 3

(24) 3*K*1,2 1

(25) 3*K*1,2 + *K*1,1 3

(26) 3*K*1,2 + 2*K*1,1 3

(27) 3*K*1,2 + 3*K*1,1 1

(28) 3*K*1,1 1

total number of covers *K*T = 109

number of kinds of covers *K*S = 28

number of non-isomorphic covers *K*S´ = 34

**Fig. S1** Pairs of non-isomorphic covers of the same kind.
